# Supplementary material
Source: PubMed Central journal article supplement (PMC3561817)
Supplement: JCI62742sd.pdf [file JCI62742sd.pdf]

## Supplemental figure

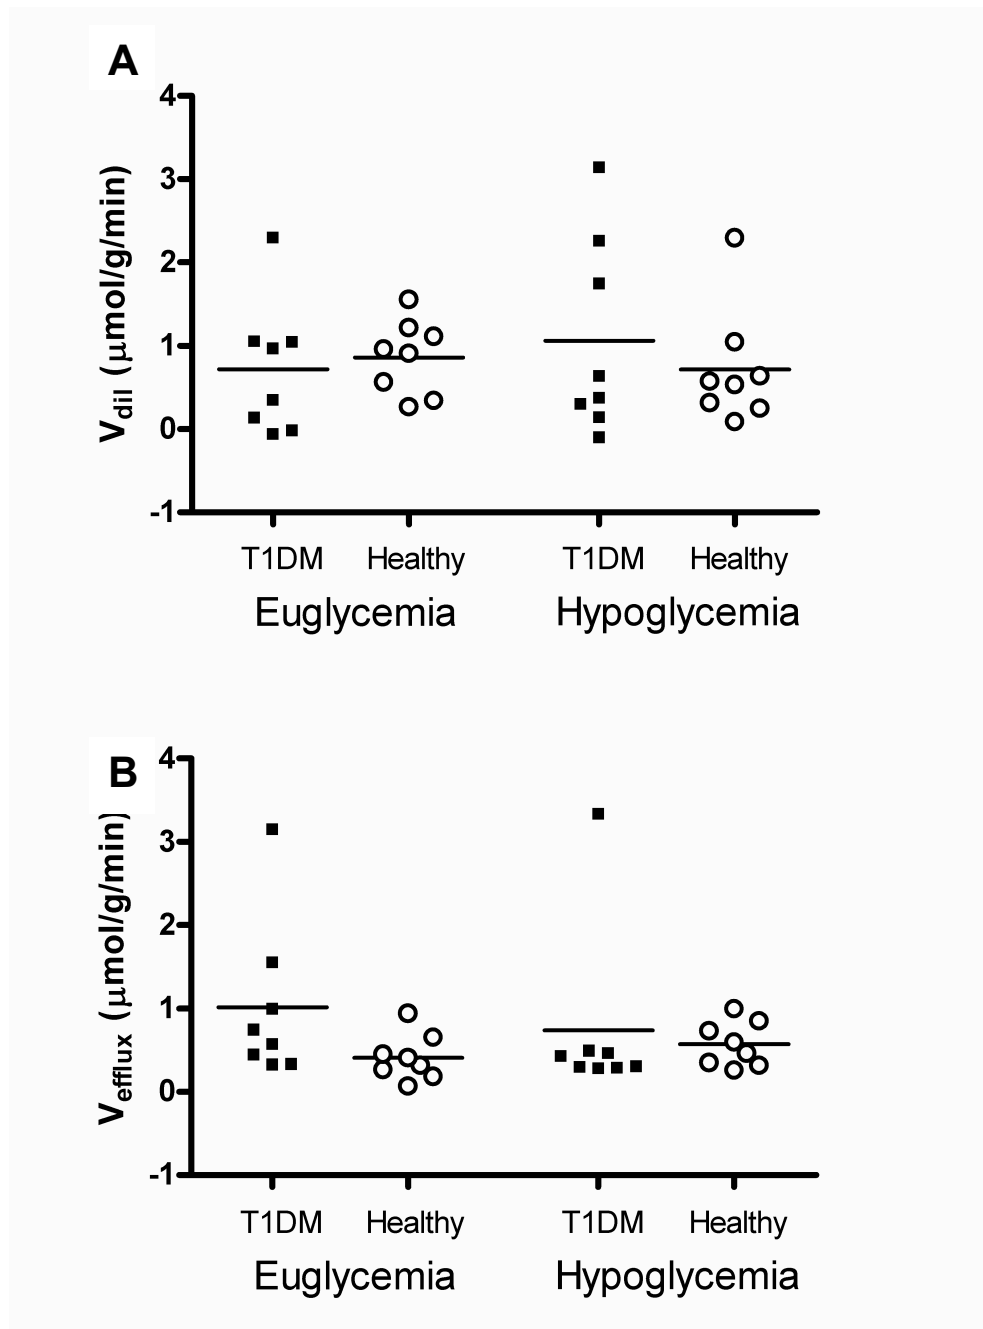

### Supplemental figure: Lactate dilution flux and efflux of glutamine

Fluxes during euglycemic and hypoglycemic clamps in patients with T1DM and healthy subjects. A) Lactate dilution flux,  $V_{dil}$ , B) Efflux of glutamine,  $V_{efflux}$ .
